# Supplementary material
Source: PubMed Central journal article supplement (PMC3879452)
Supplement: supp_mst190_sup.pdf [file supp_mst190_sup.pdf]

# Supporting information for Modeling gene expression evolution with an extended Ornstein-Uhlenbeck process

## Supporting tables

|                  | small tree | deep tree | wide tree |
|------------------|------------|-----------|-----------|
| species mean     | 13.0       | 9.29      | 9.41      |
| species variance | 2.89       | 6.31e-8   | 3.59      |

Table S 1: Simulation-determined drift v. stabilization critical values to obtain a null hypothesis false positive rate of 0.05 when  $\tau^2 = 5$  and  $\sigma^2 = 25$ .

|                           | small tree | deep tree | wide tree |
|---------------------------|------------|-----------|-----------|
| non-evolutionary v. drift | 0.99       | 0.98      | 0.98      |
| drift v. stabilization    | 0.00       | 0.06      | 0.01      |
| stabilization v. shift    | 0.67       | 0.98      | 0.95      |

Table S 2: Positive rates of model comparison tests for data simulated under expression shift with  $\Delta\theta = 10$ .

## Supporting figures

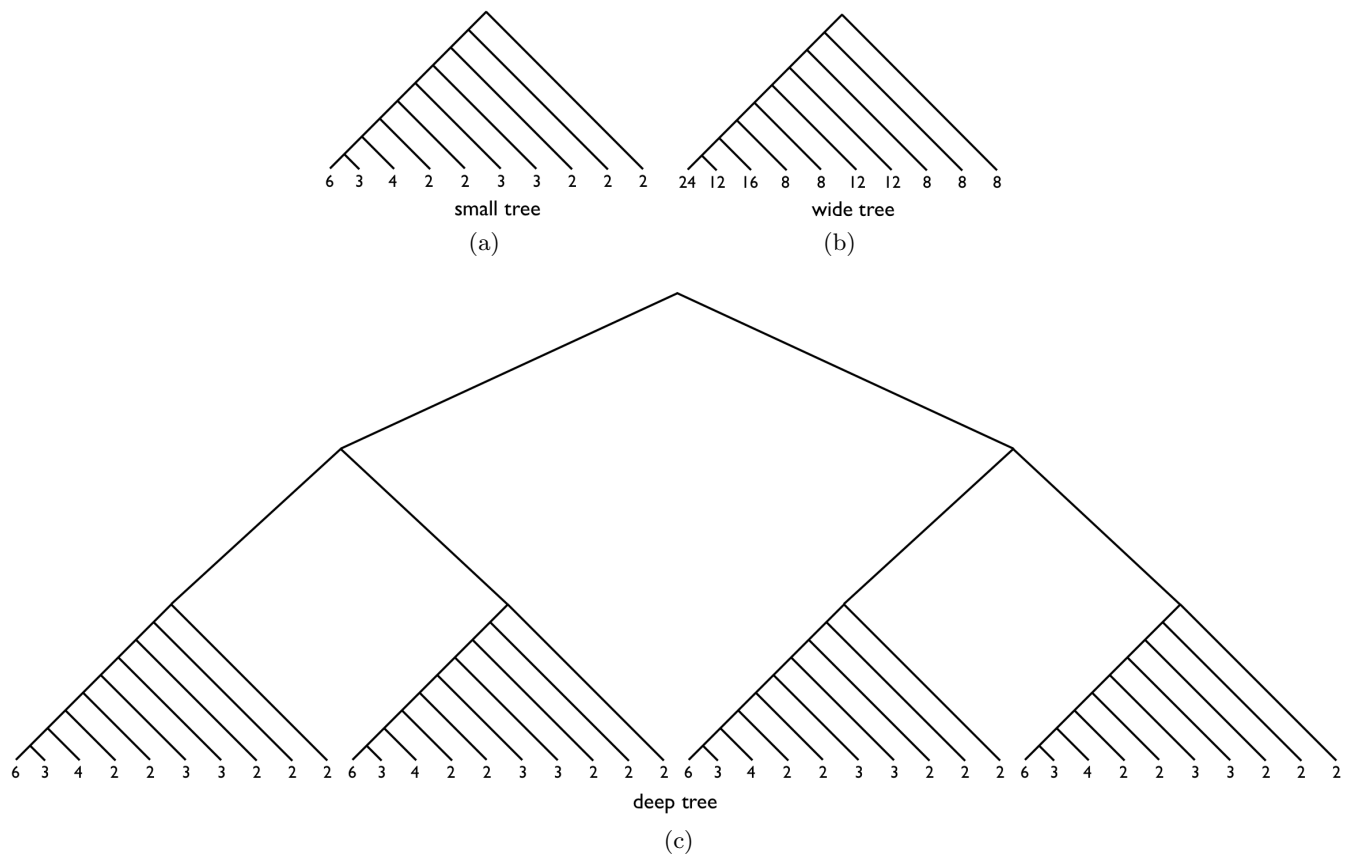

Figure S 1: Schematics of phylogenies used in analysis with the number of individuals per leaf node for (a) small tree, (b) wide tree, (c) deep tree

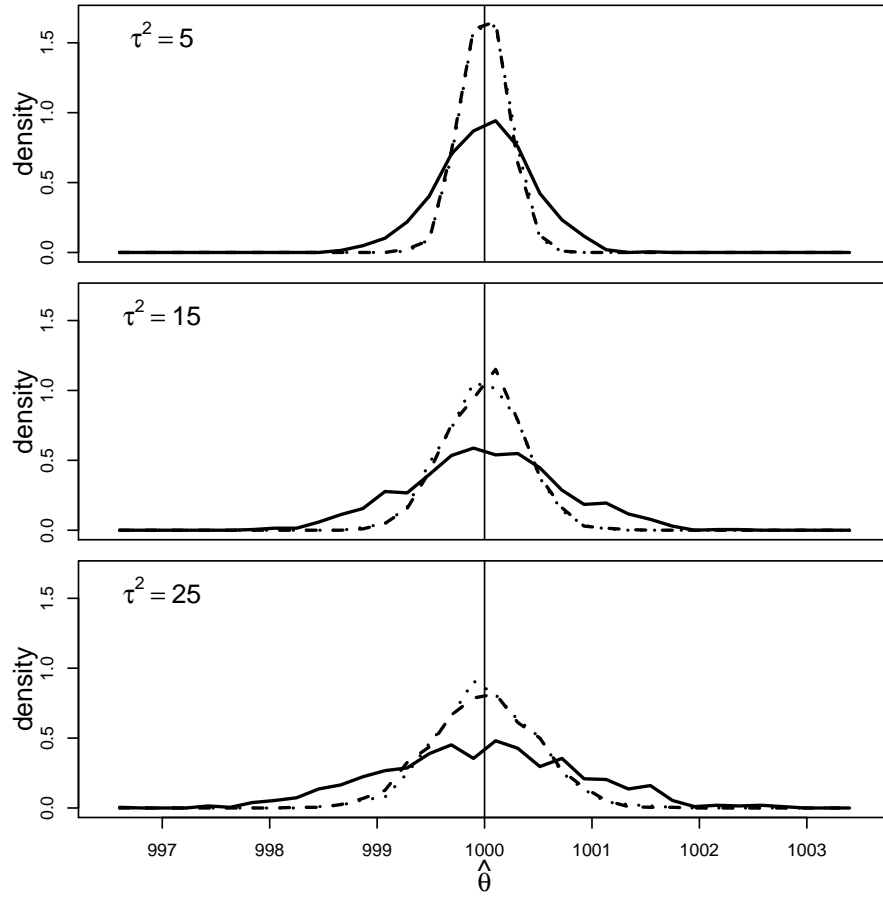

Figure S 2: Maximum likelihood  $\theta$  estimates ( $\hat{\theta}$ ) for data simulated under non-evolution and various true  $\tau^2$  values and different phylogenetic structures (solid: small tree, dashed: wide tree, dotted: deep tree)

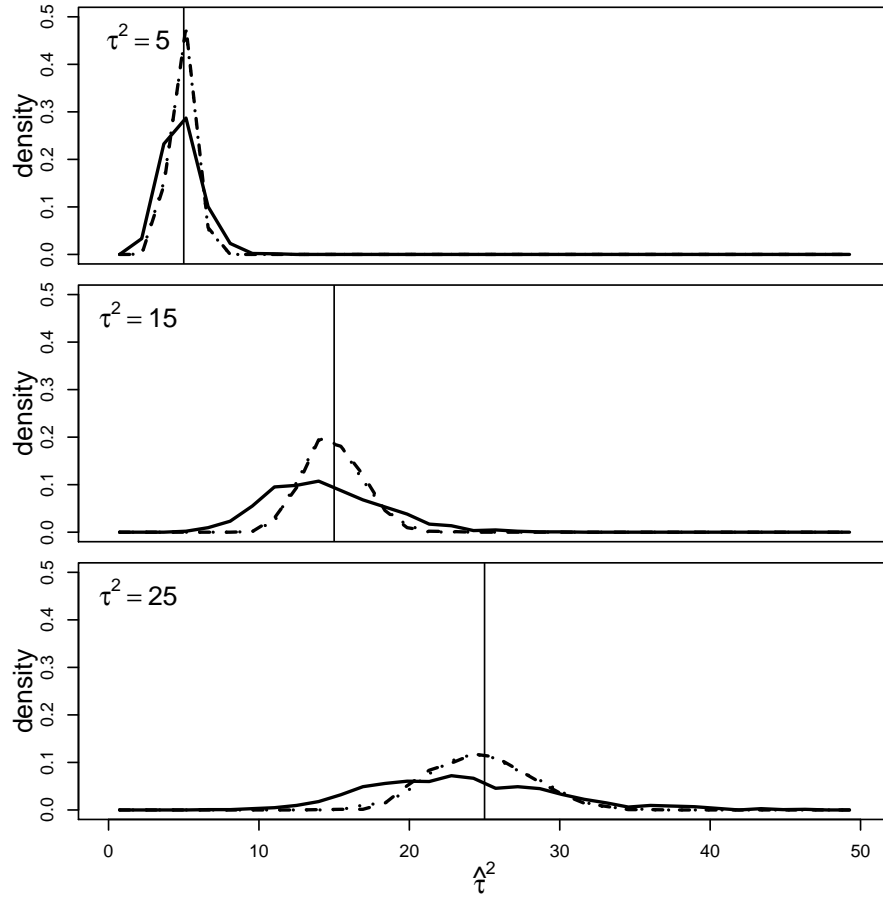

Figure S 3: Maximum likelihood  $\tau^2$  estimates ( $\hat{\tau}^2$ ) for data simulated under non-evolution and various true  $\tau^2$  values and different phylogenetic structures (solid: small tree, dashed: wide tree, dotted: deep tree)

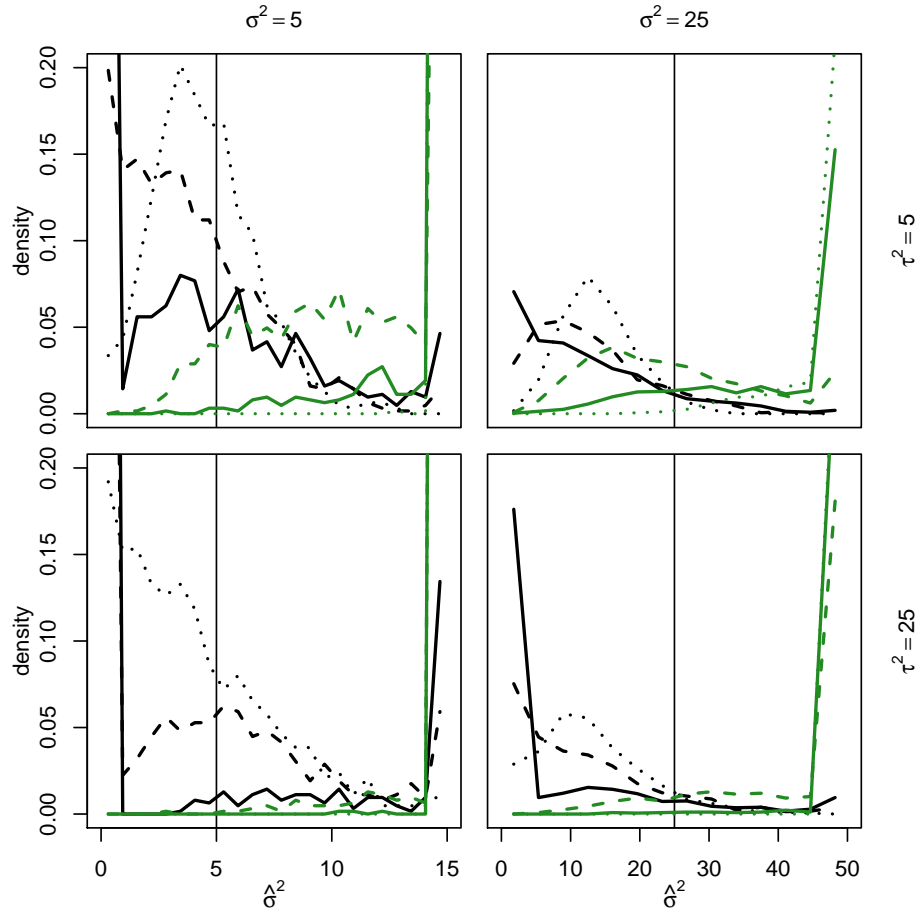

Figure S 4: Maximum likelihood  $\sigma^2$  estimates ( $\hat{\sigma}^2$ ) for data simulated under drift with various true  $\tau^2$  and  $\sigma^2$  values and different phylogenetic structures (solid: small tree, dashed: wide tree, dotted: deep tree), and both the species variance (black) and species mean models (green). Note that parameter values greater than 15 are represented in the right-most bin.

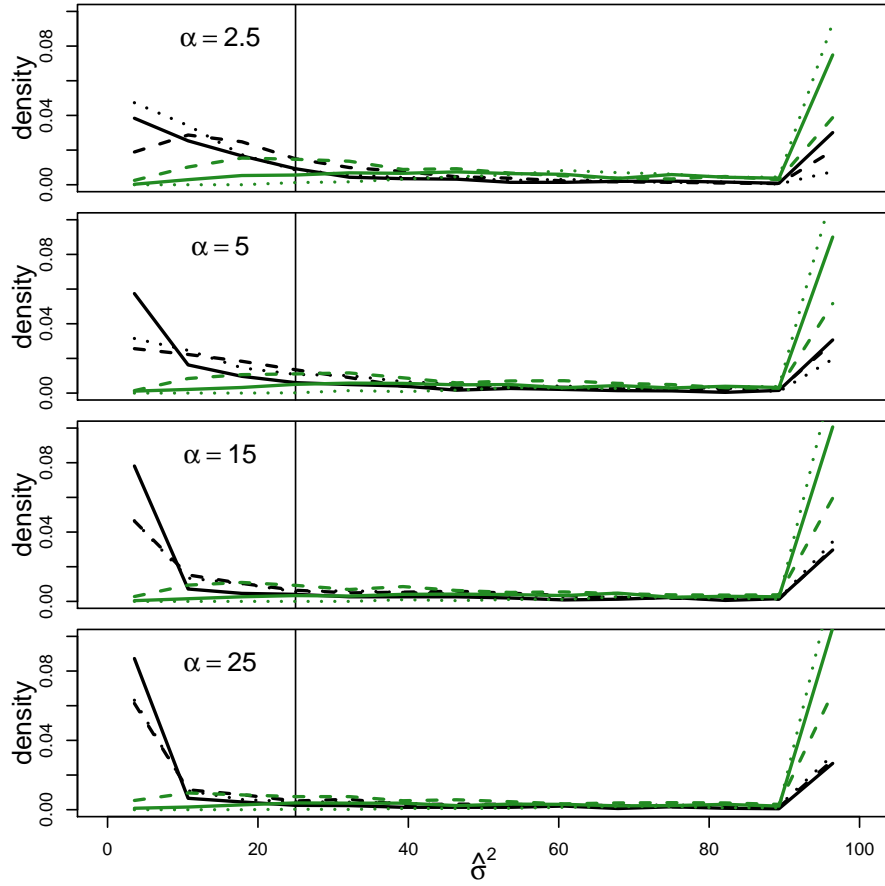

Figure S 5: Maximum likelihood  $\sigma^2$  estimates ( $\hat{\sigma}^2$ ) for data simulated under stabilizing selection with various true  $\alpha$  values and different phylogenetic structures (solid: small tree, dashed: wide tree, dotted: deep tree), and both the species variance (black) and species mean models (green). Note that parameter values greater than 100 are represented in the right-most bin.

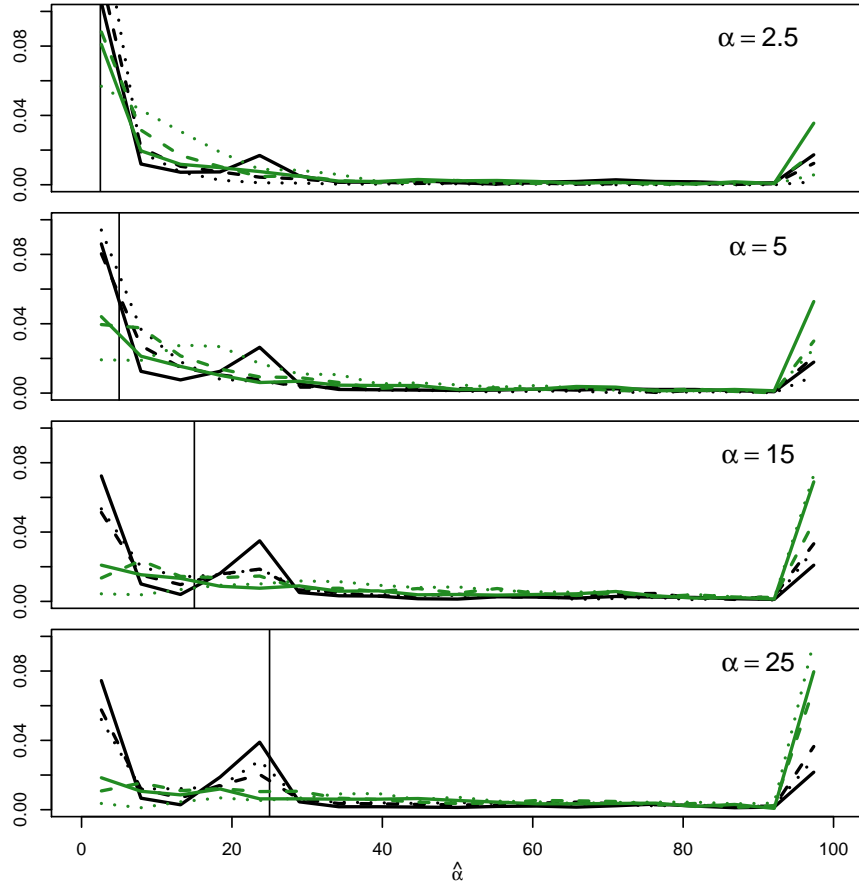

Figure S 6: Maximum likelihood  $\alpha$  estimates ( $\hat{\alpha}$ ) for data simulated under stabilizing selection with various true  $\alpha$  values and different phylogenetic structures (solid: small tree, dashed: wide tree, dotted: deep tree), and both the species variance (black) and species mean models (green). Note that parameter values greater than 100 are represented in the right-most bin.

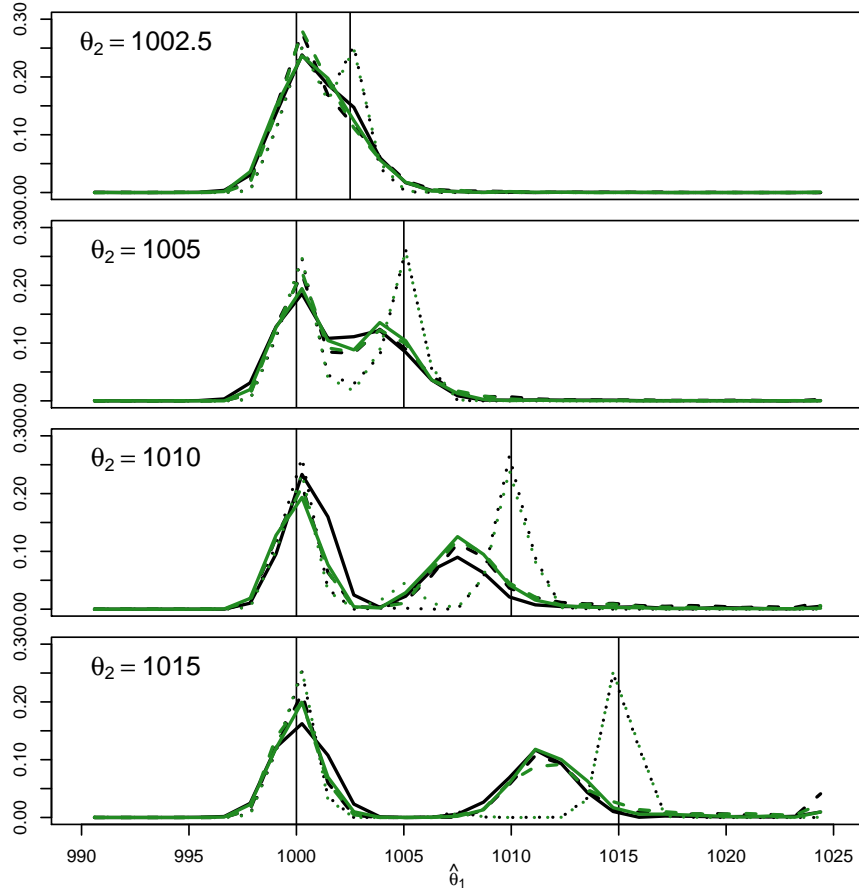

Figure S 7: Maximum likelihood  $\theta_1$  and  $\theta_2$  estimates ( $\hat{\theta}_1$  and  $\hat{\theta}_2$ ) for data simulated under expression shift with various true  $\theta_2$  values and different phylogenetic structures (solid: small tree, dashed: wide tree, dotted: deep tree), and both the species variation (black) and species mean models (green).
